# Supplementary material for: Chemical reactivity of the tryptophan/acetone/DMSO triad system and its potential applications in nanomaterial synthesis
Source: Royal Society of Chemistry journal article supplement (doi:10.1039/d3ra06596k), 2023-01-01
Supplement: d3ra06596k1.pdf [file d3ra06596k1.pdf]

## Electronic Supplementary Information

### **Chemical reactivity of the tryptophan/acetone/DMSO triad system and its potential applications in nanomaterial synthesis**

Chun-Yi Huang, Hsiao-Wei Liao, and Teh-Min Hu \*

Department of Pharmacy, College of Pharmaceutical Sciences, National Yang Ming  
Chiao Tung University, 112304 Taipei, Taiwan

\*Correspondence: T.-M. Hu, [tehmin@nycu.edu.tw](mailto:tehmin@nycu.edu.tw)

## Supplementary Methods

### 1. The HPLC-DAD conditions for the kinetic study

**Instrument:** Agilent 1260 Infinity II HPLC instrument equipped with a 1260 Infinity II quaternary pump, a 1260 Infinity II vial sampler, a 1260 Infinity II degasser, a 1260 Infinity II column thermostat, a 1260 Infinity II diode array detector, and a PC with the Agilent Chemstation software, all of which were purchased from Agilent Technologies (Waldbronn, Germany).

**Column:** Mightysil octadecyl silica (ODS) column (5  $\mu\text{m}$ ; column of dimensions 4.6  $\times$  250 mm) (Kanto, Tokyo, Japan)

**Mobile phase:** Gradient separation was conducted with 0.025% formic acid in deionized water (*v/v*) (solvent A) and 0.025% formic acid in methanol (*v/v*) (solvent B) as mobile phase. The gradient condition is shown in the following table.

**Temperature:** Autosampler (25°C); column oven (25 °C)

**Injection volume:** 20  $\mu\text{L}$

**Flow rate:** 1 mL/min

**UV-Vis detection mode:** 242, 254, and 280 nm

**Mobile phase gradients:**

| Time (min) | Solvent A (%) | Solvent B (%) |
|------------|---------------|---------------|
| 0          | 85            | 15            |
| 2.5        | 85            | 15            |
| 17.5       | 70            | 30            |
| 22.5       | 70            | 30            |
| 37.5       | 50            | 50            |
| 42.5       | 50            | 50            |
| 55         | 10            | 90            |
| 57.5       | 10            | 90            |
| 60         | 85            | 15            |
| 65         | 85            | 15            |

## 2. The UHPLC-TOF-MS conditions for the identification of mesityl oxide (MO)

**Instrument:** Agilent 1290 ultra-high-performance liquid chromatography (UHPLC) system (Waldbronn, Germany) with a Bruker maXis ultra-high-resolution (UHR) TOF mass spectrometer (Bruker Daltonics, Bremen, Germany)

**Column:** Thermo Scientific Accucore aQ C18 Polar Endcapped LC column (2.1 mm × 100 mm, 1.9 μm)

**Mobile phase:** 10-mM ammonium acetate and 0.1% formic acid in deionized water (solvent A) and 10-mM ammonium acetate and 0.1% formic acid in a 2:3 mixture of methanol and isopropanol (solvent B). The gradient condition is shown in the following table.

**Temperature:** Autosampler (4°C); column oven (40 °C)

**Injection volume:** 5 μL

**Flow rate:** 0.4 mL/min

**ESI detection mode:** negative mode (dry gas temperature, 200 °C; dry gas flow rate, 8 L/min; capillary voltage, 4500 V). The mass spectra were acquired in a full-scan mode in the range of 50–1500 *m/z*.

**Mobile phase gradients:**

| Time (min) | Solvent A (%) | Solvent B (%) |
|------------|---------------|---------------|
| 0          | 100           | 0             |
| 2          | 100           | 0             |
| 3          | 95            | 5             |
| 5          | 1             | 99            |
| 15         | 1             | 99            |

### 3. The UPLC-TOF-MS parameters for untargeted profiling

**Instrument:** Waters ACQUITY ultra-performance liquid chromatography (UPLC) system with a XEVO QTOF mass spectrometer (Milford, MA, USA).

**Column:** Agilent poroshell 120 EC-C18 column (4.6 mm × 100 mm, 2.7 μm)

**Mobile phases:** Gradient separation was conducted with 0.1% ammonium hydroxide in deionized water (solvent A) and 0.1% ammonium hydroxide in methanol (solvent B). The gradient condition is shown in following table.

**Temperatures:** Autosampler (4°C); column oven (45 °C)

**Injection volume:** 5 μL

**Flow rate:** 0.5 mL/min

**ESI detection mode:** negative mode (dry gas temperature, 200 °C; dry gas flow rate, 10 L/min; capillary voltage, 2500 V). The mass spectra were acquired in a full-scan mode in the range of 50–800 *m/z*.

**Mobile phase gradients:**

| Time (min) | Solvent A (%) | Solvent B (%) |
|------------|---------------|---------------|
| 0          | 90            | 10            |
| 5          | 90            | 10            |
| 20         | 55            | 45            |
| 60         | 51.5          | 48.5          |
| 64         | 10            | 90            |
| 70         | 10            | 90            |
| 74         | 90            | 10            |
| 80         | 90            | 10            |

#### 4. The UPLC-TOF-MS parameters for compound confirmation

**Instrument:** Waters ACQUITY ultra-performance liquid chromatography (UPLC) system with a XEVO QTOF mass spectrometer (Milford, MA, USA).

**Column:** Agilent poroshell 120 EC-C18 column (4.6 mm × 100 mm, 2.7 μm)

**Mobile phases:** Gradient separation was conducted with 0.1% ammonium hydroxide in deionized water (solvent A) and 0.1% ammonium hydroxide in methanol (solvent B). The gradient condition is shown in following table.

**Temperatures:** Autosampler (4°C); column oven (45 °C)

**Injection volume:** 5 μL

**Flow rate:** 0.5 mL/min

**ESI detection mode:** negative mode (dry gas temperature, 200 °C; dry gas flow rate, 10 L/min; capillary voltage, 2500 V). The mass spectra were acquired in a full-scan mode in the range of 50–800 *m/z*.

**Mobile phase gradients:**

| Time (min) | Solvent A (%) | Solvent B (%) |
|------------|---------------|---------------|
| 0          | 99            | 1             |
| 0.5        | 99            | 1             |
| 4.5        | 0             | 100           |
| 5          | 0             | 100           |
| 6          | 99            | 1             |
| 9          | 99            | 1             |

## Supplementary Figures

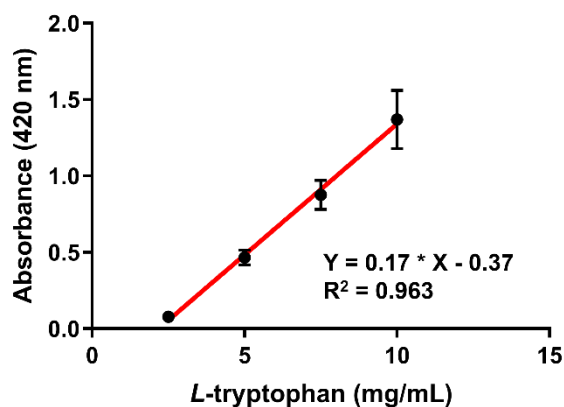

**Fig. S1.** Linear correlation between *L*-tryptophan concentration and the degree of browning, as indicated by absorbance at 420 nm. The absorbance values were obtained from the spectra data presented in Fig. 1 (absorbance at 420 nm after 1 day browning).

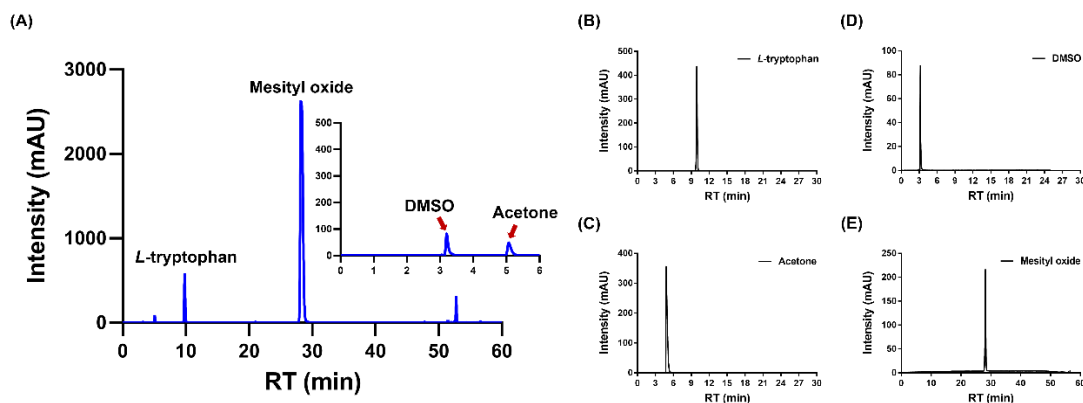

**Fig. S2.** The chromatograms were acquired for the following substances: (A) *L*-tryptophan reacted in a DMSO and acetone co-solvent system for one day, while reference standards of (B) *L*-tryptophan, (C) acetone, (D) DMSO, and (E) mesityl oxide were utilized to obtain their respective chromatograms. Peaks were identified based on their retention times (RT).

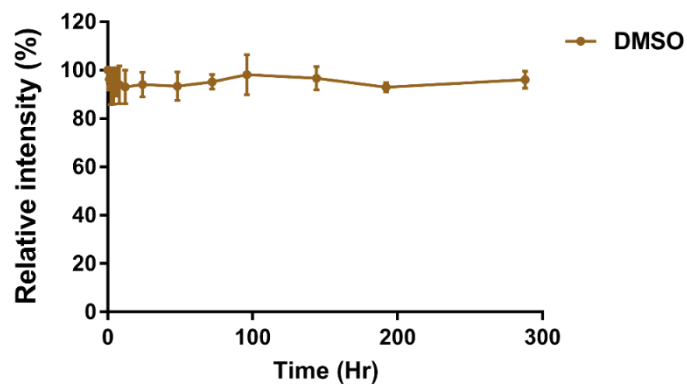

**Fig. S3.** The quantity of DMSO (indicated by relative peak intensity detected at 242 nm in HPLC) remained constant throughout the 12-day browning reaction. All data are presented as means  $\pm$  SD.

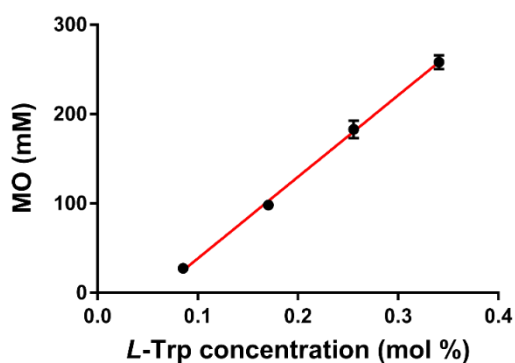

**Fig. S4.** The correlation between *L*-tryptophan concentration (mol %) and the quantity of mesityl oxide (MO) generated within 24 hours in the closed reaction system. Data are presented as means  $\pm$  SD ( $n = 3$ ).

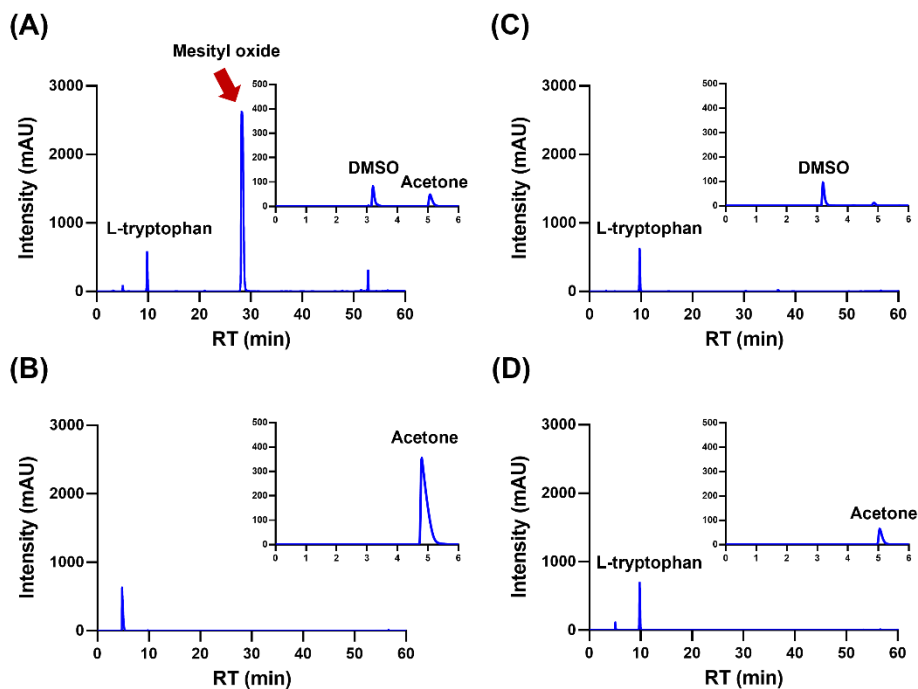

**Fig. S5.** The chromatograms were acquired for different reaction conditions. (A) *L*-tryptophan reacted in a DMSO and acetone co-solvent system. (B) *L*-tryptophan reacted in acetone alone; note that *L*-tryptophan is not soluble in acetone. (C) *L*-tryptophan reacted in DMSO alone. (D) *L*-tryptophan reacted in a ddH<sub>2</sub>O and acetone co-solvent system for one day. Peaks were identified based on their retention times (RT).

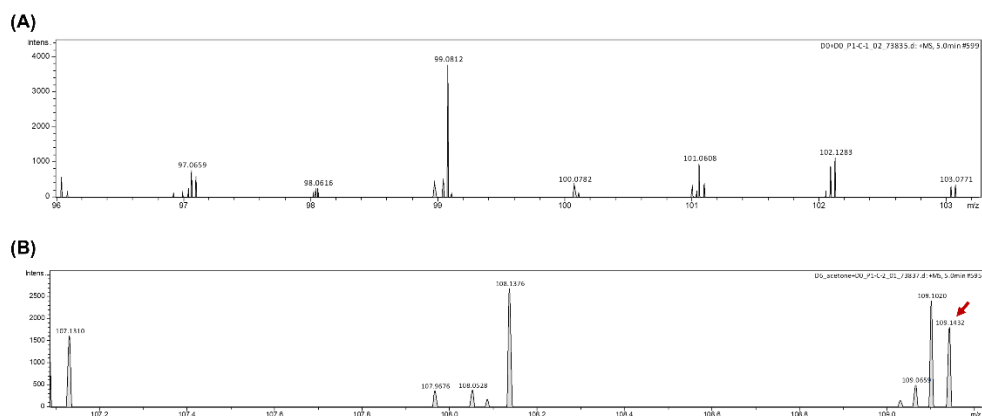

**Fig. S6.** High resolution mass spectrometry identification of mesityl oxide (C<sub>6</sub>H<sub>10</sub>O) in an *L*-tryptophan browning solution within 3 hours. The compound was detected under two conditions: (A) Using acetone-d<sub>0</sub> as the acetone source, the theoretical [M+H]<sup>+</sup> *m/z* was 99.0809, with a mass error of 3.02 ppm. (B) When acetone-d<sub>6</sub> was used as the acetone source, the theoretical [M+H]<sup>+</sup> *m/z* was 109.1432, with a mass error of 4.58 ppm.



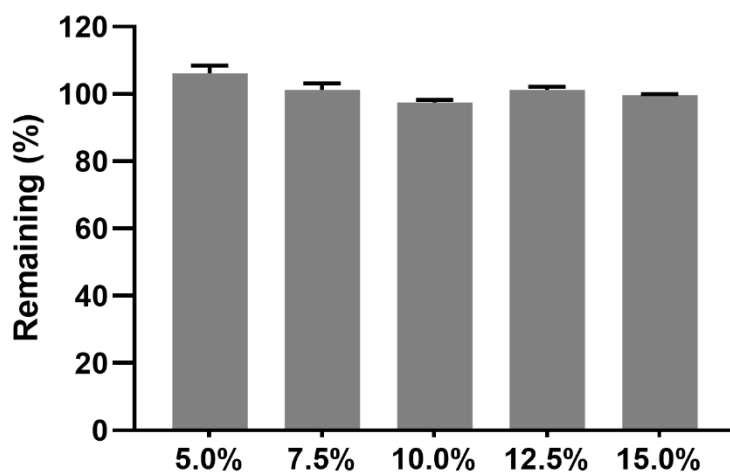

**Fig. S7.** Remaining percentage of DMSO in the DMSO/acetone/*L*-tryptophan reaction system after 3 days at room temperature. Data presented as mean  $\pm$  SD,  $n = 3$ .

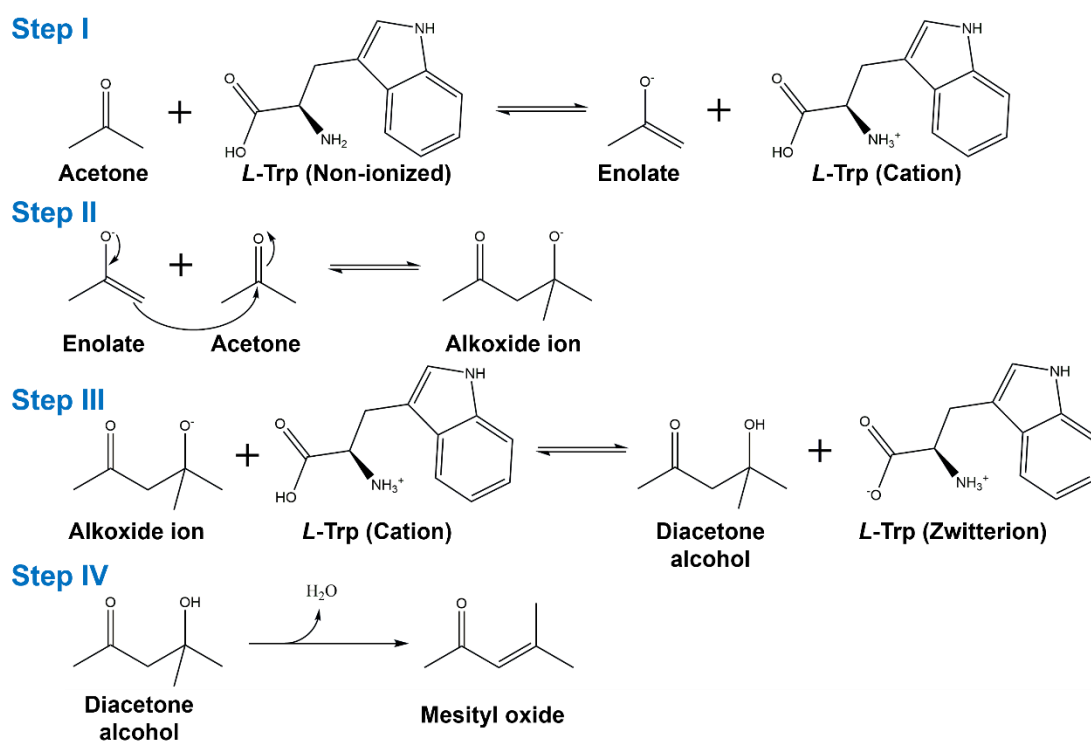

**Fig. S8.** Plausible mechanism of self-aldol condensation of two acetone molecules in DMSO with the assistance of *L*-tryptophan.

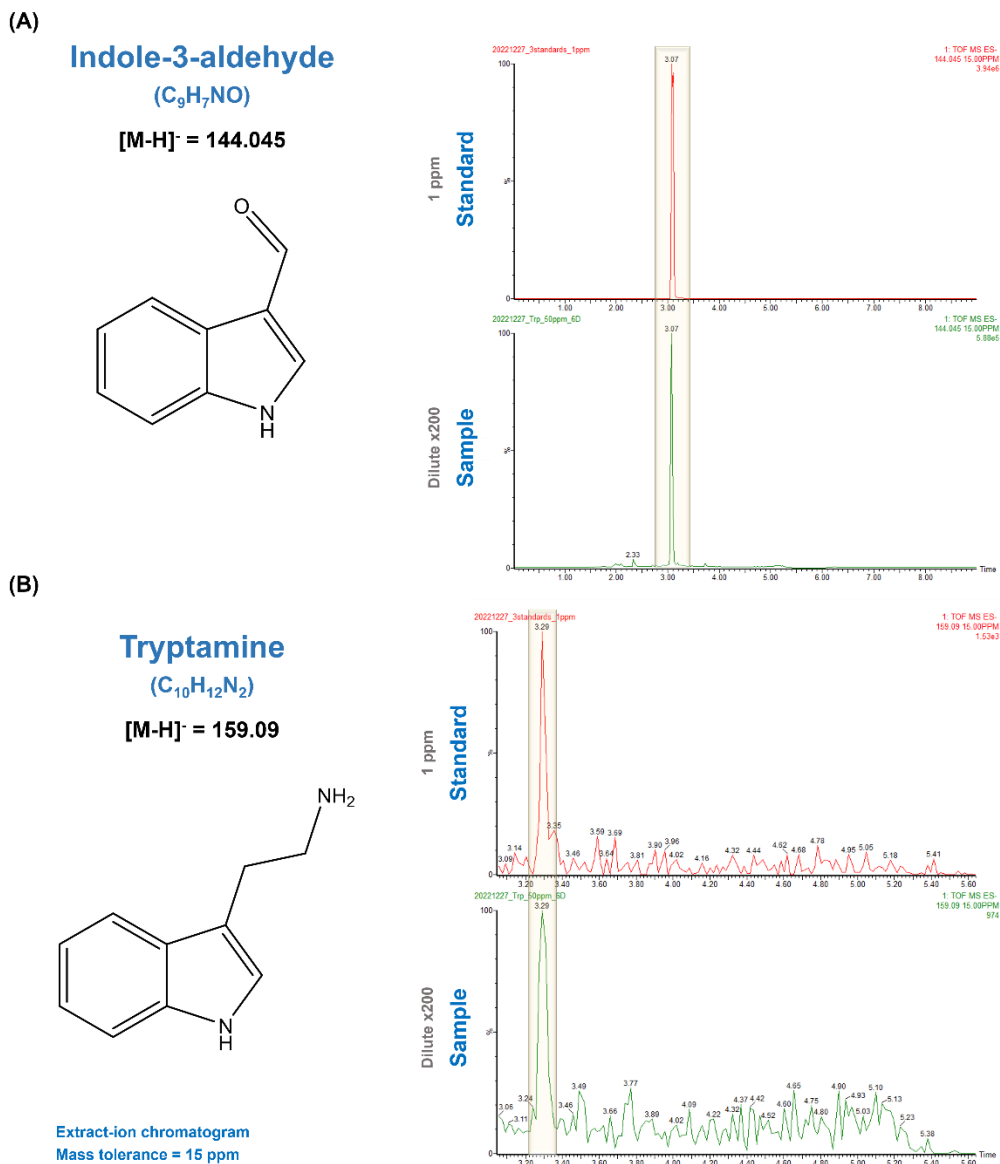

**Fig. S9.** Comparison of extracted ion chromatograms was performed between a 1  $\mu\text{g}/\text{mL}$  standard solution and a diluted sample solution to assess the presence of (A) indole-3-aldehyde and (B) tryptamine. The analyzed sample was the *L*-tryptophan browning solution following a reaction period of 6 days.

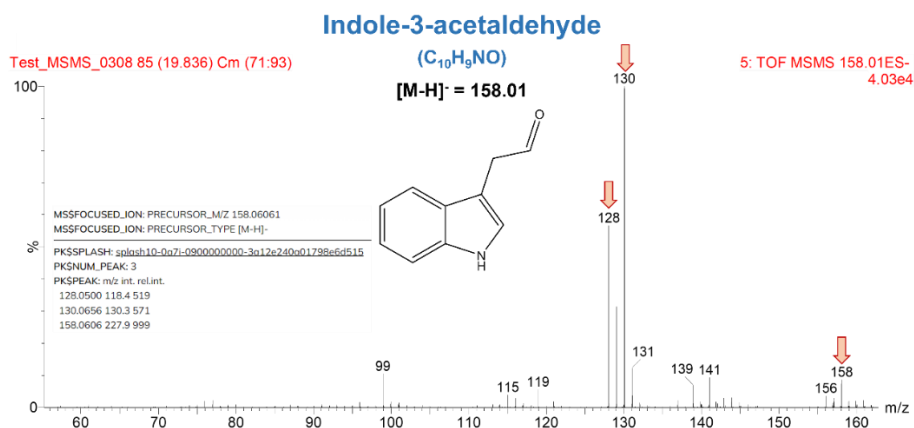

**Fig. S10.** LC-MS/MS spectrum of indole-3-acetaldehyde (identification via database comparison).

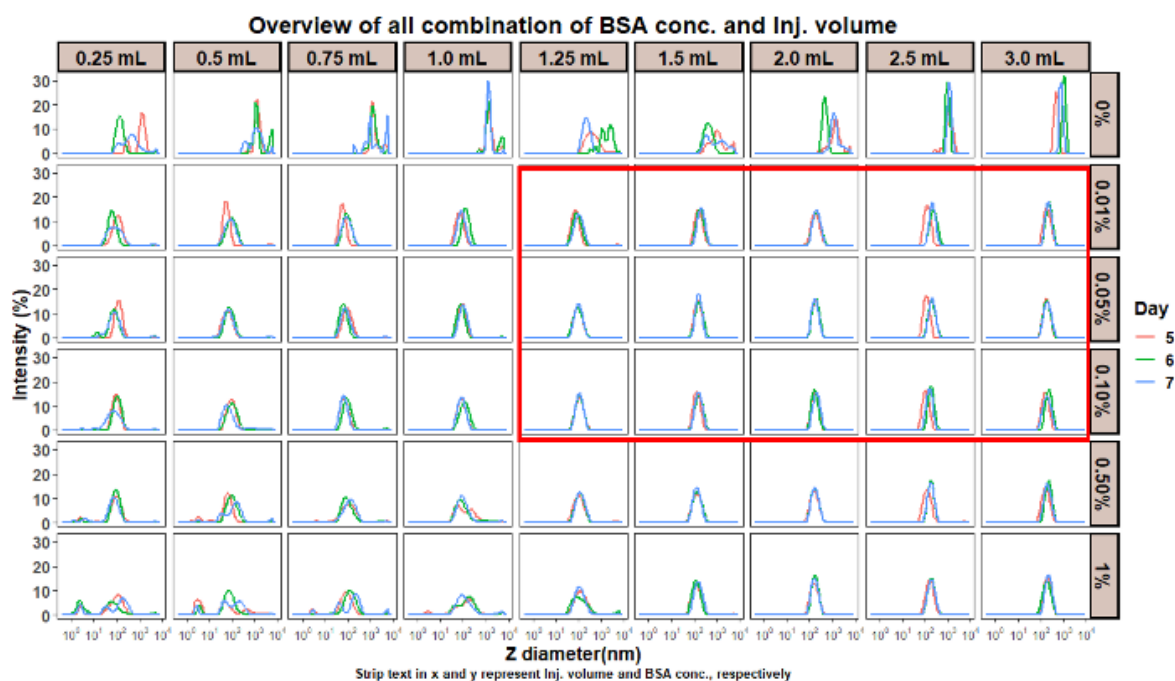

**Fig. S11.** Optimization of nanoparticle preparation via solvent-mediated browning of *L*-tryptophan. The organic phase comprises *L*-tryptophan (10 mg/mL) dissolved in a mixture of DMSO/acetone (90% v/v/10% v/v). After undergoing browning for 5, 6, or 7 days, different quantities of the organic phase were introduced into 10 mL of water with varying concentrations of bovine serum albumin (BSA). Size distribution plots are organized and displayed in a matrix format, with columns representing the volume of the organic phase injected into 10 mL of water, and rows representing the concentration of bovine serum albumin in the aqueous phase. Conditions resulting in stable and uniform nanoparticles (with a polydispersity index, PDI, ranging from 0.08 to 0.17) are highlighted within the red frame.

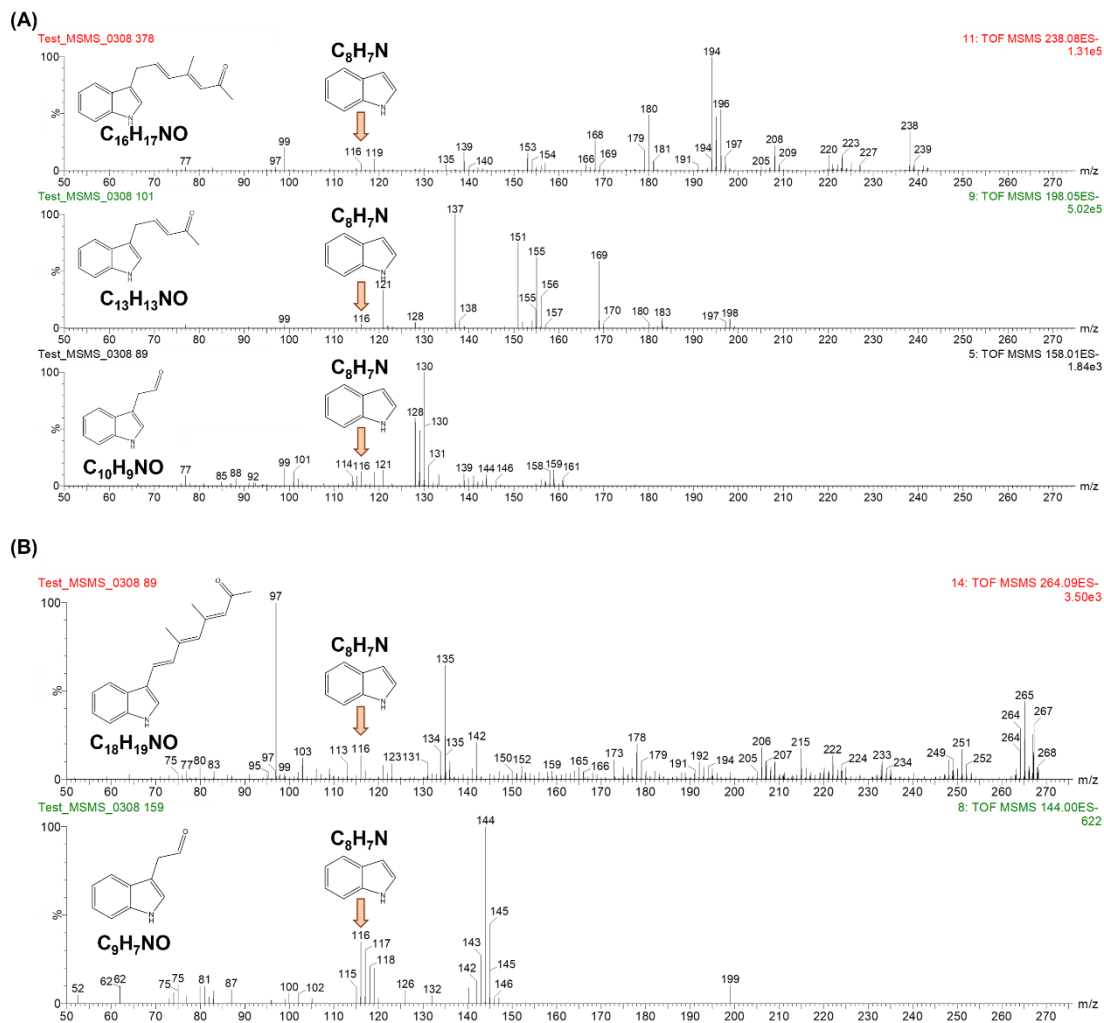

**Fig. S12.** Representative UPLC-TOF-MS/MS mass spectra for tentative indole-containing molecules extracted from nanoparticles. (A)  $C_{10}H_9NO$ ,  $C_{13}H_{13}NO$ ,  $C_{16}H_{17}NO$ ; (B)  $C_9H_7NO$ ,  $C_{18}H_{19}NO$ . Methanol was used to dissolve the nanoparticles.

## Supplementary Tables

**Table S1. Retention time, regression analysis, LODs, and LOQs for *L*-Tryptophan (*L*-Trp), acetone, and mesityl oxide (MO) in HPLC-DAD analysis.**

| Compounds              | $t_m$ (min) <sup>a</sup> | Dilute solvent     | Regression equation,<br>$Y = a + bX^b$ |        | Correlation coefficient | LOD <sup>a</sup> | LOQ <sup>a</sup> |
|------------------------|--------------------------|--------------------|----------------------------------------|--------|-------------------------|------------------|------------------|
|                        |                          |                    | $a$                                    | $b$    |                         |                  |                  |
| <i>L</i> -Trp (280 nm) | 9.9                      | ddH <sub>2</sub> O | 66.994                                 | 29.879 | 0.9998                  | 172.977          | 524.173          |
| Acetone (254 nm)       | 4.9                      | ddH <sub>2</sub> O | 8.0383                                 | 165.3  | 0.9911                  | 1.844            | 5.587            |
| MO (242 nm)            | 28.3                     | ddH <sub>2</sub> O | -37.622                                | 82.192 | 0.9998                  | 0.389            | 1.46             |
| MO (280 nm)            | 28.3                     | ddH <sub>2</sub> O | 1.3484                                 | 8.8224 | 0.9999                  | 9.601            | 29.094           |
| MO (242 nm)            | 28.1                     | DMSO               | 61.393                                 | 141.22 | 0.9999                  | 0.371            | 1.125            |
| MO (280 nm)            | 28.1                     | DMSO               | 23.024                                 | 2.290  | 0.9999                  | 9.824            | 29.771           |

<sup>a</sup>  $t_m$ : Retention time; LOD: Limit of detection; LOQ: Limit of quantification.

<sup>b</sup> Y refers to the peak area, X is the concentration of compounds ( $\mu\text{g/mL}$  for *L*-Trp and MO;  $\mu\text{L/mL}$  for acetone).

**Table S2. Extracted equivalent masses ( $m/z$ ) from the browning reaction system of *L*-tryptophan in a DMSO-acetone mixture (9:1) for 6 days. The tentatively identified molecular formulas, adduct type, retention time (RT), experimental  $m/z$ , theoretical  $m/z$ , and mass errors (in ppm) of these features are presented.**

| Tentative identified molecular formula                        | Adduct type        | RT (min) | Exp. $m/z$ | Theor. $m/z$ | Mass error (ppm) |
|---------------------------------------------------------------|--------------------|----------|------------|--------------|------------------|
| C <sub>9</sub> H <sub>7</sub> NO                              | [M-H] <sup>-</sup> | 18.005   | 144.0451   | 144.0449     | 1.32             |
| C <sub>10</sub> H <sub>9</sub> NO                             | [M-H] <sup>-</sup> | 16.529   | 158.0605   | 158.0606     | -0.54            |
| C <sub>11</sub> H <sub>9</sub> NO                             | [M-H] <sup>-</sup> | 23.216   | 170.0602   | 170.0606     | -2.07            |
| C <sub>10</sub> H <sub>10</sub> N <sub>2</sub> O              | [M-H] <sup>-</sup> | 14.075   | 173.0712   | 173.0715     | -1.95            |
| C <sub>12</sub> H <sub>11</sub> NO                            | [M-H] <sup>-</sup> | 26.082   | 184.0763   | 184.0762     | 0.4              |
| C <sub>13</sub> H <sub>13</sub> NO                            | [M-H] <sup>-</sup> | 27.593   | 198.0921   | 198.0919     | 0.85             |
| C <sub>11</sub> H <sub>12</sub> N <sub>2</sub> O <sub>2</sub> | [M-H] <sup>-</sup> | 19.916   | 203.0817   | 203.0821     | -1.81            |
| C <sub>14</sub> H <sub>13</sub> NO                            | [M-H] <sup>-</sup> | 37.695   | 210.0918   | 210.0919     | -0.68            |
| C <sub>13</sub> H <sub>11</sub> NO <sub>2</sub>               | [M-H] <sup>-</sup> | 30.762   | 212.0711   | 212.0712     | -0.54            |
| C <sub>13</sub> H <sub>13</sub> NO <sub>2</sub>               | [M-H] <sup>-</sup> | 21.472   | 214.0870   | 214.0868     | 0.76             |
| C <sub>15</sub> H <sub>15</sub> NO                            | [M-H] <sup>-</sup> | 63.644   | 224.1088   | 224.1075     | 5.62             |
| C <sub>16</sub> H <sub>17</sub> NO                            | [M-H] <sup>-</sup> | 55.566   | 238.1230   | 238.1232     | -0.78            |

|                                                               |                    |        |          |          |       |
|---------------------------------------------------------------|--------------------|--------|----------|----------|-------|
| C <sub>17</sub> H <sub>17</sub> NO                            | [M-H] <sup>-</sup> | 65.171 | 250.1241 | 250.1232 | 3.77  |
| C <sub>16</sub> H <sub>17</sub> NO <sub>2</sub>               | [M-H] <sup>-</sup> | 33.714 | 254.1182 | 254.1181 | 0.43  |
| C <sub>18</sub> H <sub>19</sub> NO                            | [M-H] <sup>-</sup> | 64.376 | 264.1383 | 264.1388 | -1.72 |
| C <sub>19</sub> H <sub>21</sub> NO                            | [M-H] <sup>-</sup> | 64.971 | 278.1559 | 278.1545 | 4.95  |
| C <sub>19</sub> H <sub>24</sub> N <sub>2</sub>                | [M-H] <sup>-</sup> | 19.166 | 279.1865 | 279.1861 | 1.4   |
| C <sub>20</sub> H <sub>21</sub> NO                            | [M-H] <sup>-</sup> | 65.669 | 290.1553 | 290.1545 | 2.86  |
| C <sub>19</sub> H <sub>20</sub> N <sub>2</sub> O              | [M-H] <sup>-</sup> | 64.256 | 291.1498 | 291.1497 | 0.46  |
| C <sub>19</sub> H <sub>23</sub> NO <sub>2</sub>               | [M-H] <sup>-</sup> | 38.525 | 296.1645 | 296.1651 | -2.09 |
| C <sub>19</sub> H <sub>26</sub> N <sub>2</sub> O              | [M-H] <sup>-</sup> | 64.874 | 297.1964 | 297.1967 | -1.13 |
| C <sub>22</sub> H <sub>28</sub> N <sub>2</sub>                | [M-H] <sup>-</sup> | 68.569 | 319.2170 | 319.2174 | -1.13 |
| C <sub>21</sub> H <sub>26</sub> N <sub>2</sub> O              | [M-H] <sup>-</sup> | 65.600 | 321.1970 | 321.1967 | 1.02  |
| C <sub>22</sub> H <sub>27</sub> NO <sub>2</sub>               | [M-H] <sup>-</sup> | 65.286 | 336.1962 | 336.1964 | -0.46 |
| C <sub>22</sub> H <sub>30</sub> N <sub>2</sub> O              | [M-H] <sup>-</sup> | 65.732 | 337.2256 | 337.228  | -7.1  |
| C <sub>22</sub> H <sub>28</sub> N <sub>2</sub> O <sub>2</sub> | [M-H] <sup>-</sup> | 65.435 | 351.2016 | 351.2073 | -16.1 |
| C <sub>21</sub> H <sub>19</sub> N <sub>3</sub> O <sub>3</sub> | [M-H] <sup>-</sup> | 14.258 | 360.1339 | 360.1348 | -2.52 |
| C <sub>25</sub> H <sub>34</sub> N <sub>2</sub> O              | [M-H] <sup>-</sup> | 24.423 | 377.2587 | 377.2584 | 0.86  |
| C <sub>25</sub> H <sub>26</sub> N <sub>4</sub> O <sub>3</sub> | [M-H] <sup>-</sup> | 15.299 | 429.1916 | 429.1927 | -2.65 |
| C <sub>26</sub> H <sub>45</sub> N <sub>5</sub> O <sub>5</sub> | [M-H] <sup>-</sup> | 69.519 | 506.3336 | 506.3342 | -1.18 |
